# Supplementary material for: Influence of particle size and interfacial interactions on the physical and mechanical properties of particle-filled myofibrillar protein gels
Source: Royal Society of Chemistry journal article supplement (doi:10.1039/c5ra07254a), 2015-01-01
Supplement: c5ra07254a1.pdf [file c5ra07254a1.pdf]

Supplementary Information

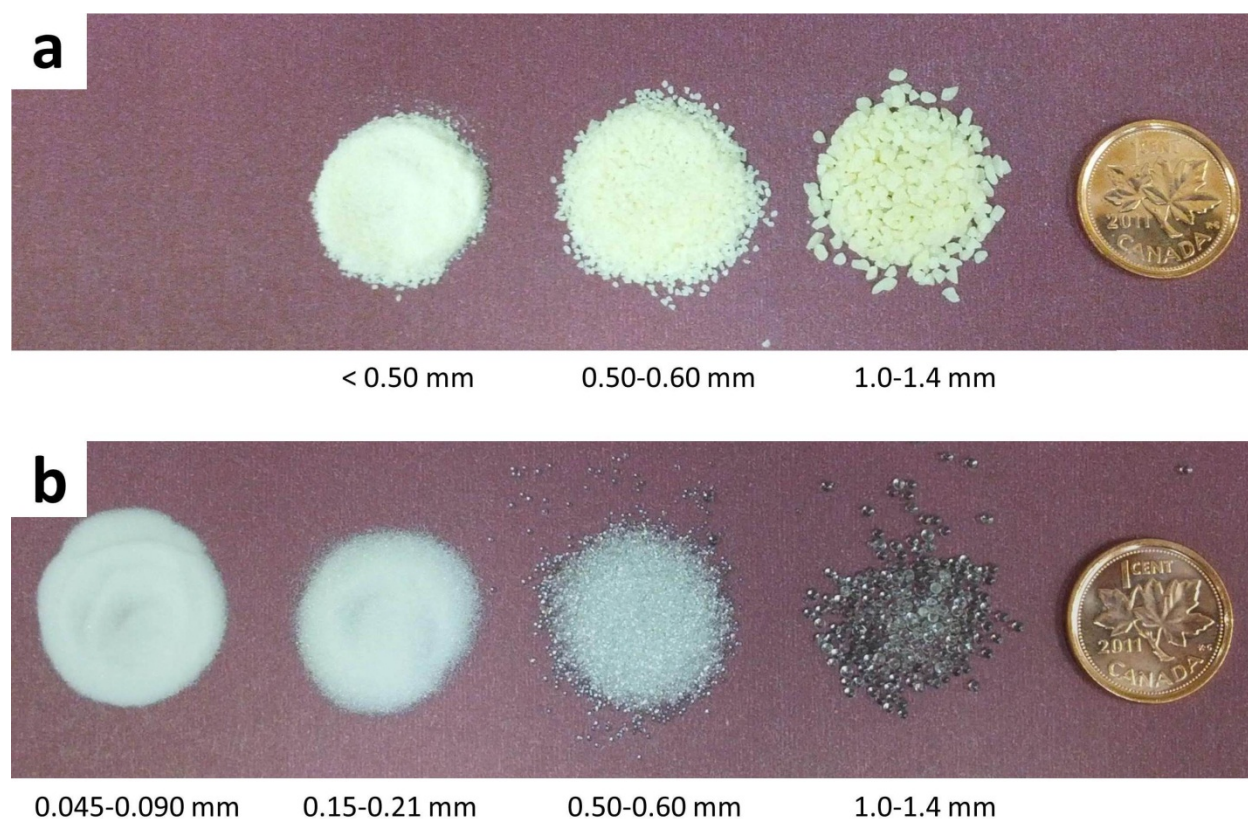

*Figure S1: Filler particles used in the comminuted meat protein gel composites. a) rice bran wax; left to right: < 0.50 mm, 0.50-0.60 mm, and 1.0-1.4 mm. b) glass beads; left to right: 0.045-0.090 mm, 0.15-0.21 mm, 0.50-0.60 mm, and 1.0-1.4 mm. Coin included for size comparison.*
